# Supplementary material for: HMGA1 As a Potential Prognostic and Therapeutic Biomarker in Breast Cancer
Source: Hindawi journal article supplement (doi:10.1155/2022/7466555), 2022-11-26

**A****MCF-7**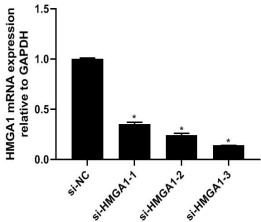**B****MDA-MB-231**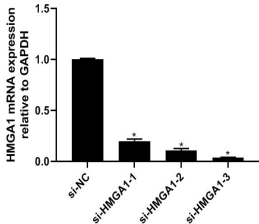

Supplement: f1 [file 7466555.f1.pdf]
