# Supplementary material for: HMGA1 As a Potential Prognostic and Therapeutic Biomarker in Breast Cancer
Source: Hindawi journal article supplement (doi:10.1155/2022/7466555), 2022-11-26
Supplement: f2 [file 7466555.f2.pdf]

A

## Kaplan-Meier survival estimates of HMGA1 expression

Node all; ER all; PR all

(all RNA-seq data)

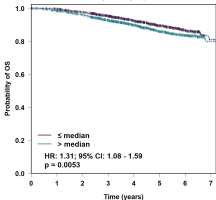

Patients at risk:

|                 | 0     | 1     | 2     | 3     | 4     | 5   | 6   | 7  | (Events) |
|-----------------|-------|-------|-------|-------|-------|-----|-----|----|----------|
| — $\leq$ median | 2 009 | 1 869 | 1 823 | 1 838 | 1 163 | 697 | 301 | 63 | (188)    |
| — > median      | 2 007 | 1 921 | 1 799 | 1 518 | 1 124 | 687 | 325 | 55 | (243)    |

B

## Kaplan-Meier survival estimates of HMGA1 expression

Node all; ER all; PR all

(all RNA-seq data)

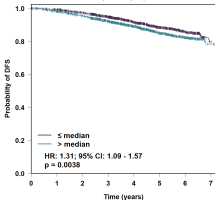

Patients at risk:

|                 | 0     | 1     | 2     | 3     | 4     | 5   | 6   | 7  | (Events) |
|-----------------|-------|-------|-------|-------|-------|-----|-----|----|----------|
| — $\leq$ median | 2 009 | 1 862 | 1 818 | 1 831 | 1 064 | 688 | 294 | 57 | (204)    |
| — > median      | 2 007 | 1 914 | 1 783 | 1 515 | 1 118 | 680 | 318 | 49 | (263)    |
