# Supplementary material for: HMGA1 As a Potential Prognostic and Therapeutic Biomarker in Breast Cancer
Source: Hindawi journal article supplement (doi:10.1155/2022/7466555), 2022-11-26

**A**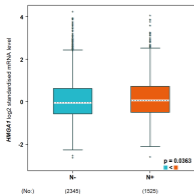**B**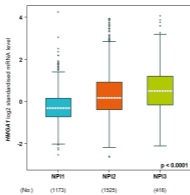**C**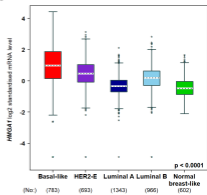**D**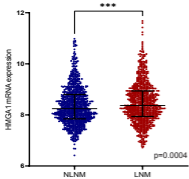**E**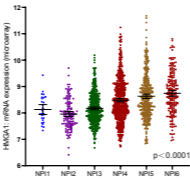**F**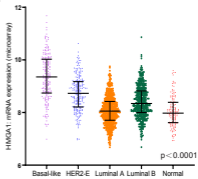

Supplement: f3 [file 7466555.f3.pdf]
